# Supplementary material for: Popular Gym Fitness Sport: An Analysis of 1387 Recreational Athletes Regarding Prone to Pain Exercises and the Corresponding Localisations
Source: MDPI journal article supplement (doi:10.3390/sports12010012), 2023-12-29
Supplement: s1 [file s1]

Supplementary file Tab. S 1: Questionnaire for personal and training-specific aspects  
(translated into English for publication)

|                                                                                                                                                                                                                                                                                                                   |
|-------------------------------------------------------------------------------------------------------------------------------------------------------------------------------------------------------------------------------------------------------------------------------------------------------------------|
| Year of birth                                                                                                                                                                                                                                                                                                     |
| Weight (in kg)                                                                                                                                                                                                                                                                                                    |
| Height (in cm)                                                                                                                                                                                                                                                                                                    |
| Gender                                                                                                                                                                                                                                                                                                            |
| How long have you been working out at the gym, or how many years have you been working out at the gym in the past, if you are no longer working out at the gym?<br><input type="radio"/> 1 – 2 years<br><input type="radio"/> 2 – 3 years<br><input type="radio"/> 3 – 7 years<br><input type="radio"/> > 8 years |
| How often do you exercise per week (perhaps additionally at home)?<br><input type="radio"/> 1 – 2 times a week<br><input type="radio"/> 3 – 4 times a week<br><input type="radio"/> 4 – 6 times a week<br><input type="radio"/> daily                                                                             |
| Do you follow a training plan (if so, who created the plan)?<br><input type="radio"/> Yes, created on my own<br><input type="radio"/> Yes, created online<br><input type="radio"/> Yes, created by a coach<br><input type="radio"/> No                                                                            |
| Enter the total hours of your fitness training per week                                                                                                                                                                                                                                                           |
| Do you regularly participate in other sports besides fitness?                                                                                                                                                                                                                                                     |
| What other sports do you do besides fitness training and at what level (competitive, hobby)?                                                                                                                                                                                                                      |
| What is your level of physical activity at work?<br><input type="radio"/> physically high active (> 8 hours)<br><input type="radio"/> physically active (4 – 8 hours)<br><input type="radio"/> physically moderate active (2 – 4 hours)<br><input type="radio"/> physically inactive (0 – 2 hours)                |
| Do you smoke?<br><input type="radio"/> Yes<br>if yes how many cigarettes per year _____<br>if yes how many years _____<br><input type="radio"/> No                                                                                                                                                                |
| Are you doing a warm – up regularly?<br><input type="radio"/> Yes, 1 – 5 min<br><input type="radio"/> Yes, 5 – 10 min<br><input type="radio"/> > 10 min<br><input type="radio"/> No                                                                                                                               |
